# Supplementary material for: Secretome analysis of in vitro aged human mesenchymal stem cells reveals IGFBP7 as a putative factor for promoting osteogenesis
Source: PubMed Central journal article supplement (PMC5854613; doi:10.1038/s41598-018-22855-z), 2018-03-15
Supplement: 41598_2018_22855_MOESM1_ESM.pdf [file 41598_2018_22855_MOESM1_ESM.pdf]

**Secretome analysis of in vitro aged human mesenchymal stem cells  
reveals IGFBP7 as a putative factor for promoting osteogenesis**

Arantza Infante\* and Clara I. Rodríguez\*<sup>1</sup>

\*Stem Cells and Cell Therapy Laboratory, BioCruces Health Research Institute, Cruces  
University Hospital, Barakaldo 48903, Spain

<sup>1</sup>Corresponding author: Clara I. Rodríguez

E-mail: cirodriguez@osakidetza.eus

Supplementary information

**Supplementary Table S1.** Differentially secreted proteins in preA-hMSCs-CM compared *versus* ctrl-hMSCs-CM (Fold change).  
<sup>1</sup>Ab: Secreted factors detected by antibody arrays; MS: Secreted factors detected by LS-MS, <sup>2</sup> Role in bone metabolism; <sup>3</sup> Regulated secretion in osteogenesis of hMSCs; <sup>4</sup> Dysregulated secretion in preA-adipocytes, fold induction is indicated in parentheses, \*TGFB pathway, Bold: detected by both antibody arrays and LS-MS

| Protein description                                                    | Name        | Fold  | 1  | 2 | 3 | 4       |
|------------------------------------------------------------------------|-------------|-------|----|---|---|---------|
| S100 Calcium-Binding Protein A6 (Calcyclin)                            | S100A6      | 42.82 | Ab | √ | √ | √(11.9) |
| Fibronectin                                                            | FN1*        | 30.72 | Ab | √ | √ | √(18.2) |
| Vascular Endothelial Growth Factor A                                   | VEGF        | 29.02 | Ab | √ |   |         |
| Transforming Growth Factor Beta Induced                                | TGFB1*      | 19.85 | Ab | √ | √ | √(50.1) |
| Transmembrane Protein With EGF Like And Two Follistatin Like Domains 2 | TMEFF2      | 15.77 | Ab |   |   |         |
| Parathyroid Hormone Like Hormone                                       | PTH1H       | 12.52 | Ab | √ |   |         |
| Insulin Like Growth Factor Binding Protein 7                           | IGFBP7*     | 12.50 | Ab | √ | √ | √(3.5)  |
| Serpin Family E Member 1                                               | SERPINE1*   | 9.87  | Ab | √ | √ | √(2.1)  |
| C-Type Lectin Domain Family 3 Member B                                 | CLEC3B      | 9.23  | Ab | √ |   | √(3.0)  |
| Inhibin Beta A Subunit                                                 | INHBA*      | 5.82  | Ab |   |   |         |
| Fibrinogen Alpha Chain                                                 | FGA         | 4.84  | Ab |   |   | √(2.0)  |
| <b>Pentraxin 3</b>                                                     | <b>PTX3</b> | 4.67  | Ab | √ | √ |         |
| Secreted Frizzled Related Protein 4                                    | SFRP4       | 4.31  | Ab | √ | √ | √(3.9)  |
| Transcription Factor SOX-2                                             | SOX2        | 4.31  | Ab |   |   |         |
| Fibroblast Growth Factor 7                                             | FGF7        | 3.88  | Ab |   |   |         |
| Amyloid Beta Precursor Protein                                         | APP         | 3.54  | Ab | √ | √ | √(3.1)  |
| Thrombospondin 1                                                       | THBS1*      | 3.45  | Ab | √ | √ | √(21.7) |
| ADAM Metallopeptidase With Thrombospondin Type 1 Motif 10              | ADAMTS10    | 3.14  | Ab |   |   | √(4.4)  |
| Integrin Binding Sialoprotein                                          | IBSP        | 2.85  | Ab | √ |   | √(5.4)  |
| Granulin                                                               | GRN         | 2.66  | Ab | √ | √ | √(2.2)  |
| ROS Proto-Oncogene 1, Receptor Tyrosine Kinase                         | ROS1        | 2.61  | Ab |   |   | √(2.1)  |
| Cystatin B                                                             | CSTB        | 2.55  | Ab | √ |   | √(6.6)  |
| KRAS Proto-Oncogene, GTPase                                            | KRAS        | 2.43  | Ab |   |   |         |
| Legumain                                                               | LGMN        | 2.39  | Ab | √ | √ | √(3.2)  |
| Dickkopf WNT Signaling Pathway Inhibitor 1                             | DKK1        | 2.37  | Ab | √ |   | √(2.6)  |
| Secreted Protein Acidic And Cysteine Rich                              | SPARC       | 2.24  | Ab | √ | √ |         |
| Ectodysplasin A                                                        | EDA         | 2.22  | Ab | √ |   |         |
| Insulin Like Growth Factor Binding Protein 1                           | IGFBP1      | 2.21  | Ab | √ |   |         |
| S100 Calcium Binding Protein G                                         | S100G       | 2.13  | Ab |   |   |         |
| Cathepsin B                                                            | CTSB        | 2.10  | Ab | √ | √ | √(3.3)  |
| Calcitonin Related Polypeptide Alpha                                   | CALCA       | 2.09  | Ab |   |   | √(2.4)  |
| <b>Calreticulin</b>                                                    | <b>CALR</b> | 2.08  | Ab | √ | √ |         |
| Solute Carrier Family 2 Member 2                                       | SLC2A2      | 2.01  | Ab |   |   |         |
| Kallikrein 5                                                           | KLK5        | 2.01  | Ab |   |   | √(4.2)  |
| Toll Like Receptor 3                                                   | TLR3        | 0.49  | Ab |   |   |         |
| Synuclein Gamma                                                        | SNCG        | 0.47  | Ab |   |   | √(2.6)  |
| Matrix Metallopeptidase 24                                             | MMP24       | 0.34  | Ab |   |   |         |
| Angiotensin I Converting Enzyme 2                                      | ACE2        | 0.30  | Ab |   |   |         |
| Beta-2-Microglobulin                                                   | B2M         | 0.29  | Ab | √ | √ |         |
| Lymphotoxin Beta                                                       | LTB         | 0.21  | Ab |   |   |         |
| Interleukin 11                                                         | IL11        | 0.19  | Ab | √ |   | √(2.6)  |
| Thyroid Peroxidase                                                     | TPO         | 0.15  | Ab |   |   |         |
| FK506 Binding Protein 9                                                | FKBP9       | 20.52 | MS | √ | √ |         |
| Ribosomal protein S12                                                  | RPS12       | 17.06 | MS | √ | √ |         |
| Potassium Channel Tetramerization Domain Containing 12                 | KCTD12      | 13.65 | MS |   |   |         |
| FK506 Binding Protein 10                                               | FKBP10      | 13.57 | MS | √ |   |         |
| Prosaposin                                                             | PSAP        | 11.49 | MS | √ | √ | √(0.44) |
| AHNAK Nucleoprotein                                                    | AHNAK       | 7.70  | MS |   |   |         |
| Reticulocalbin 1                                                       | RCN1        | 7.67  | MS |   |   |         |
| Cathepsin D                                                            | CTSD        | 6.70  | MS | √ | √ |         |

|                                                            |             |      |    |   |   |          |
|------------------------------------------------------------|-------------|------|----|---|---|----------|
| Lectin, Mannose Binding 2                                  | LMAN2       | 6.27 | MS |   |   |          |
| Nucleobindin 2                                             | NUCB2       | 5.27 | MS | √ |   |          |
| Procollagen-Lysine,2-Oxoglutarate 5-Dioxygenase 1          | PLOD1       | 5.10 | MS | √ | √ |          |
| Protein Kinase C Substrate 80K-H                           | PRKCSH      | 4.47 | MS |   |   |          |
| Calumenin                                                  | CALU        | 4.33 | MS | √ | √ |          |
| Lectin, Mannose Binding 2                                  | LMAN2       | 6.27 | MS |   |   |          |
| Nucleobindin 2                                             | NUCB2       | 5.27 | MS | √ |   |          |
| Procollagen-Lysine,2-Oxoglutarate 5-Dioxygenase 1          | PLOD1       | 5.10 | MS | √ | √ |          |
| Protein Kinase C Substrate 80K-H                           | PRKCSH      | 4.47 | MS |   |   |          |
| Calumenin                                                  | CALU        | 4.33 | MS | √ | √ |          |
| Heat Shock Protein Family A (Hsp70) Member 5               | HSPA5       | 4.27 | MS |   |   |          |
| Reticulocalbin 3                                           | RCN3        | 3.82 | MS | √ | √ |          |
| Serpin Family H Member 1                                   | SERPINH1*   | 3.31 | MS | √ | √ |          |
| Prolyl 4-Hydroxylase Subunit Beta                          | P4HB        | 3.23 | MS | √ | √ |          |
| Protein Disulfide Isomerase Family A Member 3              | PDIA3       | 3.21 | MS | √ | √ |          |
| LIM And SH3 Protein 1                                      | LASPI*      | 3.07 | MS |   |   |          |
| Hemoglobin Subunit Alpha 1                                 | HBA1        | 2.84 | MS |   |   |          |
| Annexin A2                                                 | ANXA2       | 2.61 | MS | √ | √ |          |
| <b>Pentraxin 3</b>                                         | <b>PTX3</b> | 2.61 | MS | √ | √ |          |
| Galectin 1                                                 | LGALS1      | 2.56 | MS |   |   | √ (10.4) |
| Collagen Type VI Alpha 3 Chain                             | COL6A3      | 2.56 | MS | √ | √ |          |
| <b>Calreticulin</b>                                        | <b>CALR</b> | 2.40 | MS | √ | √ |          |
| Lactate Dehydrogenase A                                    | LDHA        | 2.10 | MS | √ | √ | √ (2.0)  |
| Transgelin                                                 | TAGLN*      | 2.04 | MS | √ | √ |          |
| Actin Beta                                                 | ACTB        | 1.83 | MS |   |   |          |
| Stanniocalcin 2                                            | STC2        | 1.68 | MS | √ | √ |          |
| Fibulin                                                    | FBLN1*      | 1.61 | MS | √ | √ |          |
| Insulin Like Growth Factor Binding Protein 3               | IGFBP3      | 1.57 | MS | √ |   | √ (2.2)  |
| HtrA Serine Peptidase 1                                    | HTRA*       | 1.55 | MS | √ | √ |          |
| Procollagen C-Endopeptidase Enhancer                       | PCOLCE      | 1.48 | MS | √ | √ |          |
| Biglycan                                                   | BGN*        | 0.64 | MS | √ | √ |          |
| Versican                                                   | VCAN        | 0.54 | MS |   |   |          |
| Collagen Type I Alpha 1 Chain                              | COL1A1*     | 0.54 | MS | √ | √ |          |
| NPC Intracellular Cholesterol Transporter 2                | NPC2        | 0.49 | MS | √ | √ |          |
| EGF Containing Fibulin Like Extracellular Matrix Protein 2 | EFEMP2      | 0.45 | MS | √ | √ |          |
| Lumican                                                    | LUM*        | 0.43 | MS | √ | √ |          |
| Collagen Type IV Alpha 2 Chain                             | COL4A2*     | 0.43 | MS | √ | √ |          |
| Insulin Like Growth Factor Binding Protein 4               | IGFBP4      | 0.36 | MS | √ | √ |          |
| Immunoglobulin Superfamily Containing Leucine Rich Repeat  | ISLR        | 0.30 | MS |   |   |          |
| Collagen Type I Alpha 2 Chain                              | COL1A2*     | 0.30 | MS | √ | √ |          |
| Serglycin                                                  | SRGN        | 0.30 | MS | √ | √ | √ (0.49) |

**Supplementary Table S2.** Differentially secreted proteins in preA-adipocytes-CM compared *versus* ctrl-adipocytes-CM (Fold change). <sup>1</sup>Ab: Secreted factors detected by antibody arrays; MS: Secreted factors detected by LS-MS, <sup>2</sup>Role in bone metabolism.

| <b>Protein description</b>                               | <b>Name</b> | <b>Fold</b> | <b>1</b> | <b>2</b> |
|----------------------------------------------------------|-------------|-------------|----------|----------|
| Transforming Growth Factor Beta Induced                  | TGFBI       | 50.1        | Ab       | √        |
| Thrombospondin 1                                         | THBS1       | 21.7        | Ab       | √        |
| Fibronectin                                              | FN1         | 18.2        | Ab       | √        |
| Parathyroid Hormone Like Hormone                         | PTH1H       | 17.6        | Ab       |          |
| C-X-C Motif Chemokine Ligand 1                           | CXCL1       | 15.1        | Ab       |          |
| Serpin Family A Member 5                                 | SERPINA5    | 13.9        | Ab       |          |
| Plasminogen                                              | PLG         | 12.7        | Ab       |          |
| Cyclin Dependent Kinase Inhibitor 1A                     | CDKN1A      | 12.6        | Ab       |          |
| S100 Calcium Binding Protein A6                          | S100A6      | 11.9        | Ab       | √        |
| Galectin 1                                               | LGALS1      | 10.4        | Ab       | √        |
| TNF Receptor Superfamily Member 4                        | TNFRSF4     | 10.1        | Ab       |          |
| Leucine Rich Alpha-2-Glycoprotein 1                      | LRG1        | 10.0        | Ab       |          |
| Galectin 3                                               | LGALS3      | 10.0        | Ab       | √        |
| Pim-2 Proto-Oncogene, Serine/Threonine Kinase            | PIM2        | 9.5         | Ab       |          |
| Diablo IAP-Binding Mitochondrial Protein                 | DIABLO      | 8.6         | Ab       |          |
| Dickkopf WNT Signaling Pathway Inhibitor 3               | DKK3        | 8.5         | Ab       | √        |
| Interleukin 9                                            | IL9         | 8.1         | Ab       |          |
| Intercellular Adhesion Molecule 3                        | ICAM3       | 8.0         | Ab       |          |
| Angiopoietin Like 4                                      | ANGPTL4     | 7.5         | Ab       |          |
| Chordin Like 1                                           | CHRDL1      | 7.5         | Ab       |          |
| Fibroblast Growth Factor 17                              | FGF17       | 6.8         | Ab       |          |
| MET Proto-Oncogene, Receptor Tyrosine Kinase             | MET         | 6.6         | Ab       |          |
| Cystatin B                                               | CSTB        | 6.6         | Ab       |          |
| SMAD Family Member 2                                     | SMAD2       | 6.3         | Ab       |          |
| Interleukin 5                                            | IL5         | 6.1         | Ab       |          |
| Myostatin                                                | MSTN        | 6.0         | Ab       |          |
| Fibrinogen Beta Chain                                    | FGB         | 6.0         | Ab       |          |
| Syndecan 3                                               | SDC3        | 5.7         | Ab       |          |
| Vascular Endothelial Growth Factor A                     | VEGFA       | 5.6         | Ab       |          |
| Integrin Binding Sialoprotein                            | IBSP        | 5.4         | Ab       |          |
| Growth Differentiation Factor 11                         | GDF11       | 5.1         | Ab       |          |
| HtrA Serine Peptidase 2                                  | HTRA2       | 5.1         | Ab       |          |
| Serpin Family A Member 4                                 | SERPINA4    | 5.0         | Ab       |          |
| Cathepsin L                                              | CTSL        | 5.0         | Ab       | √        |
| Colony Stimulating Factor 2 Receptor Beta Common Subunit | CSF2RB      | 5.0         | Ab       |          |
| Interleukin 6                                            | IL6         | 5.0         | Ab       |          |

|                                                            |               |     |    |   |
|------------------------------------------------------------|---------------|-----|----|---|
| C-X-C Motif Chemokine Ligand 12                            | CXCL12        | 4.9 | Ab |   |
| Growth Differentiation Factor 9                            | GDF9          | 4.9 | Ab |   |
| C-X-C Motif Chemokine Ligand 8                             | CXCL8         | 4.8 | Ab |   |
| HRas Proto-Oncogene, GTPase                                | HRAS          | 4.5 | Ab |   |
| Progesterone Receptor                                      | PGR           | 4.5 | Ab |   |
| ADAM Metallopeptidase With Thrombospondin Type 1 Motif 10  | ADAMTS10      | 4.4 | Ab |   |
| Granzyme A                                                 | GZMA          | 4.4 | Ab |   |
| Growth Differentiation Factor 1                            | GDF1          | 4.4 | Ab |   |
| Fibroblast Growth Factor 18                                | FGF18         | 4.3 | Ab |   |
| Interleukin 21                                             | IL21          | 4.3 | Ab |   |
| Interleukin 18 Receptor 1                                  | IL18R1        | 4.2 | Ab |   |
| Kallikrein Related Peptidase 5                             | KLK5          | 4.2 | Ab |   |
| Heat Shock Protein Family A (Hsp70) Member 4               | HSPA4         | 4.2 | Ab |   |
| Endothelial Cell Adhesion Molecule                         | ESAM          | 4.1 | Ab |   |
| Tumor Necrosis Factor Superfamily Member 4                 | TNFSF4        | 4.1 | Ab |   |
| Serpin Family A Member 12                                  | SERPINA12     | 4.1 | Ab |   |
| Clusterin                                                  | CLU           | 4.0 | Ab | √ |
| Secreted Frizzled Related Protein 4                        | SFRP4         | 3.9 | Ab | √ |
| Pancreatic And Duodenal Homeobox 1                         | PDX1          | 3.9 | Ab |   |
| Receptor-Like Tyrosine Kinase                              | RYK           | 3.9 | Ab |   |
| BMP Binding Endothelial Regulator                          | BMPER         | 3.8 | Ab |   |
| Adiponectin, C1Q And Collagen Domain Containing            | ADIPOQ        | 3.8 | Ab |   |
| Heat Shock Protein Family B (Small) Member 6               | HSPB6         | 3.8 | Ab |   |
| Interleukin 7                                              | IL7           | 3.8 | Ab |   |
| Reversion Inducing Cysteine Rich Protein With Kazal Motifs | RECK          | 3.7 | Ab |   |
| Heparin Binding EGF Like Growth Factor                     | HBEGF         | 3.6 | Ab |   |
| ADAM Metallopeptidase Domain 17                            | ADAM17        | 3.6 | Ab |   |
| C-C Motif Chemokine Ligand 28                              | CCL28         | 3.6 | Ab |   |
| Gremlin 1, DAN Family BMP Antagonist                       | GREM1         | 3.6 | Ab |   |
| Interferon Gamma                                           | IFNG          | 3.5 | Ab |   |
| Insulin Like Growth Factor Binding Protein 7               | IGFBP7        | 3.5 | Ab | √ |
| Interleukin 13                                             | IL13          | 3.5 | Ab |   |
| Decorin                                                    | DCN           | 3.5 | Ab | √ |
| Interleukin 15                                             | IL15          | 3.5 | Ab |   |
| Interleukin 18 Binding Protein                             | IL18BP        | 3.4 | Ab |   |
| Cathepsin B                                                | CTSB          | 3.3 | Ab | √ |
| TATA-Box Binding Protein Associated Factor 4               | TAF4          | 3.3 | Ab |   |
| TNF Receptor Superfamily Member 8                          | TNFRSF8       | 3.3 | Ab |   |
| Frizzled Class Receptor 6                                  | FZD6          | 3.3 | Ab |   |
| Presenilin 2                                               | PSEN2         | 3.3 | Ab |   |
| Endothelin 1                                               | EDN1          | 3.2 | Ab |   |
| Legumain                                                   | LGMN          | 3.2 | Ab | √ |
| Insulin Like Growth Factor Binding Protein 2               | <b>IGFBP2</b> | 3.1 | Ab | √ |
| Amyloid Beta Precursor Protein                             | APP           | 3.1 | Ab | √ |
| Midkine (Neurite Growth-Promoting Factor 2)                | MDK           | 3.1 | Ab |   |
| Fas Associated Via Death Domain                            | FADD          | 3.1 | Ab |   |
| Interleukin 1 Receptor Accessory Protein                   | IL1RAP        | 3.0 | Ab |   |
| C-Type Lectin Domain Family 3 Member B                     | CLEC3B        | 3.0 | Ab |   |
| Colony Stimulating Factor 3                                | CSF3          | 3.0 | Ab |   |
| Interleukin 2                                              | IL2           | 3.0 | Ab |   |
| S100 Calcium Binding Protein A12                           | S100A12       | 3.0 | Ab |   |
| Tumor Protein P53                                          | TP53          | 2.9 | Ab |   |
| Chemerin Chemokine-Like Receptor 1                         | CMKLR1        | 2.9 | Ab |   |
| Frizzled Class Receptor 1                                  | FZD1          | 2.9 | Ab |   |
| Tec Protein Tyrosine Kinase                                | TEC           | 2.9 | Ab |   |

|                                                                          |          |     |    |   |
|--------------------------------------------------------------------------|----------|-----|----|---|
| Fibroblast Growth Factor 13                                              | FGF13    | 2.9 | Ab |   |
| C-X-C Motif Chemokine Ligand 14                                          | CXCL14   | 2.9 | Ab |   |
| Dickkopf WNT Signaling Pathway Inhibitor 4                               | DKK4     | 2.9 | Ab |   |
| Basal Cell Adhesion Molecule (Lutheran Blood Group)                      | BCAM     | 2.9 | Ab |   |
| Interleukin 19                                                           | IL19     | 2.8 | Ab |   |
| Interleukin 17 Receptor D                                                | IL17RD   | 2.8 | Ab |   |
| Fatty Acid Binding Protein 4                                             | FABP4    | 2.8 | Ab |   |
| Semaphorin 3A                                                            | SEMA3A   | 2.8 | Ab |   |
| X-Linked Inhibitor Of Apoptosis                                          | XIAP     | 2.8 | Ab |   |
| Proopiomelanocortin                                                      | POMC     | 2.8 | Ab |   |
| Fibroblast Growth Factor 2                                               | FGF2     | 2.8 | Ab |   |
| Paraoxonase 2                                                            | PON2     | 2.8 | Ab |   |
| Serine/Threonine-Protein Kinase PAK 7                                    | PAK7     | 2.8 | Ab |   |
| C-X-C Motif Chemokine Ligand 9                                           | CXCL9    | 2.7 | Ab |   |
| Complement Factor D                                                      | CFD      | 2.7 | Ab |   |
| Glypican 5                                                               | GPC5     | 2.7 | Ab |   |
| Interleukin 34                                                           | IL34     | 2.7 | Ab |   |
| Interleukin 1 Receptor Accessory Protein Like 1                          | IL1RAPL1 | 2.7 | Ab |   |
| Endoglin                                                                 | ENG      | 2.7 | Ab |   |
| C-C Motif Chemokine Ligand 11                                            | CCL11    | 2.7 | Ab |   |
| Receptor Tyrosine Kinase Like Orphan Receptor 2                          | ROR2     | 2.7 | Ab |   |
| WNT Inhibitory Factor 1                                                  | WIF1     | 2.7 | Ab |   |
| Growth Differentiation Factor 3                                          | GDF3     | 2.7 | Ab |   |
| C-C Motif Chemokine Ligand 2                                             | CCL2     | 2.6 | Ab |   |
| Endothelial Cell Specific Molecule 1                                     | ESM1     | 2.6 | Ab |   |
| Transferrin Receptor                                                     | TFRC     | 2.6 | Ab |   |
| Neuronal Pentraxin Receptor                                              | NPTXR    | 2.6 | Ab |   |
| Thymic Stromal Lymphopoietin                                             | TSLP     | 2.6 | Ab |   |
| C-C Motif Chemokine Ligand 27                                            | CCL27    | 2.6 | Ab |   |
| Lymphatic Vessel Endothelial Hyaluronan Receptor 1                       | LYVE1    | 2.6 | Ab |   |
| SERTA Domain Containing 2                                                | SERTAD2  | 2.6 | Ab |   |
| Macrophage Migration Inhibitory Factor (Glycosylation-Inhibiting Factor) | MIF      | 2.6 | Ab | √ |
| Synuclein Gamma                                                          | SNCG     | 2.6 | Ab |   |
| Interleukin 11                                                           | IL11     | 2.6 | Ab |   |
| Rho Associated Coiled-Coil Containing Protein Kinase 1                   | ROCK1    | 2.6 | Ab |   |
| Serpin Family A Member 3                                                 | SERPINA3 | 2.6 | Ab |   |
| Dickkopf WNT Signaling Pathway Inhibitor 1                               | DKK1     | 2.6 | Ab |   |
| Fms Related Tyrosine Kinase 1                                            | FLT1     | 2.5 | Ab |   |
| Pyruvate Kinase, Muscle                                                  | PKM      | 2.5 | Ab |   |
| Trefoil Factor 1                                                         | TFF1     | 2.5 | Ab |   |
| Serpin Family B Member 5                                                 | SERPINB5 | 2.5 | Ab |   |
| Interferon Lambda 1                                                      | IFNL1    | 2.5 | Ab |   |
| C-X-C Motif Chemokine Ligand 5                                           | CXCL5    | 2.5 | Ab |   |
| Frizzled Class Receptor 4                                                | FZD4     | 2.5 | Ab |   |
| Chordin Like 2                                                           | CHRD2    | 2.5 | Ab |   |
| CD1a Molecule                                                            | CD1A     | 2.5 | Ab |   |
| TNF Receptor Superfamily Member 25                                       | TNFRSF25 | 2.5 | Ab |   |
| Fucosyltransferase 4                                                     | FUT4     | 2.5 | Ab |   |
| Geminin, DNA Replication Inhibitor                                       | GMNN     | 2.5 | Ab |   |
| Family With Sequence Similarity 3 Member B                               | FAM3B    | 2.5 | Ab |   |
| Interleukin 16                                                           | IL16     | 2.5 | Ab |   |
| Fibroblast Growth Factor Binding Protein 1                               | FGFBP1   | 2.5 | Ab |   |
| Aminoacyl TRNA Synthetase Complex Interacting Multifunctional Protein    | AIMP1    | 2.5 | Ab |   |
| IL2 Inducible T-Cell Kinase                                              | ITK      | 2.5 | Ab |   |

|                                                    |          |     |    |   |
|----------------------------------------------------|----------|-----|----|---|
| Interleukin 15 Receptor Subunit Alpha              | IL15RA   | 2.4 | Ab |   |
| Lactotransferrin                                   | LTF      | 2.4 | Ab |   |
| Matrix Metallopeptidase 11                         | MMP11    | 2.4 | Ab |   |
| Calcitonin Related Polypeptide Alpha               | CALCA    | 2.4 | Ab |   |
| Epidermal Growth Factor                            | EGF      | 2.4 | Ab |   |
| Fas Ligand                                         | FASLG    | 2.4 | Ab |   |
| Cyclin Dependent Kinase Inhibitor 1B               | CDKN1B   | 2.4 | Ab |   |
| Transferrin                                        | TF       | 2.4 | Ab |   |
| Interleukin 1 Alpha                                | IL1A     | 2.4 | Ab |   |
| C-X-C Motif Chemokine Ligand 13                    | CXCL13   | 2.4 | Ab |   |
| Fas Cell Surface Death Receptor                    | FAS      | 2.4 | Ab |   |
| Cytotoxic T-Lymphocyte Associated Protein 4        | CTLA4    | 2.3 | Ab |   |
| Cerberus 1, DAN Family BMP Antagonist              | CER1     | 2.3 | Ab |   |
| Protein S (Alpha)                                  | PROS1    | 2.3 | Ab | √ |
| Fibroblast Growth Factor 16                        | FGF16    | 2.3 | Ab |   |
| Growth Differentiation Factor 5                    | GDF5     | 2.3 | Ab |   |
| Glutathione Peroxidase 1                           | GPX1     | 2.3 | Ab |   |
| Chitinase 3 Like 1                                 | CHI3L1   | 2.3 | Ab |   |
| Galectin 3 Binding Protein                         | LGALS3BP | 2.3 | Ab | √ |
| Hepatitis A Virus Cellular Receptor 1              | HAVCR1   | 2.3 | Ab |   |
| APC, WNT Signaling Pathway Regulator               | APC      | 2.3 | Ab |   |
| FER Tyrosine Kinase                                | FER      | 2.2 | Ab |   |
| RELA Proto-Oncogene, NF-KB Subunit                 | RELA     | 2.2 | Ab |   |
| C-X-C Motif Chemokine Ligand 2                     | CXCL2    | 2.2 | Ab |   |
| SPARC Like 1                                       | SPARCL1  | 2.2 | Ab |   |
| Apelin Receptor                                    | APLNR    | 2.2 | Ab |   |
| Insulin Like Growth Factor Binding Protein 4       | IGFBP4   | 2.2 | Ab | √ |
| Insulin Like Growth Factor Binding Protein 3       | IGFBP3   | 2.2 | Ab |   |
| Cardiotrophin 1                                    | CTF1     | 2.2 | Ab |   |
| Tyrosine Kinase Non Receptor 1                     | TNK1     | 2.2 | Ab |   |
| CD40 Molecule                                      | CD40     | 2.2 | Ab |   |
| Neurotrophic Receptor Tyrosine Kinase 2            | NTRK2    | 2.2 | Ab |   |
| Neurofibromin 1                                    | NF1      | 2.2 | Ab |   |
| Granulin Precursor                                 | GRN      | 2.2 | Ab | √ |
| LDL Receptor Related Protein 6                     | LRP6     | 2.2 | Ab |   |
| Intelectin 1                                       | ITLN1    | 2.2 | Ab |   |
| LYN Proto-Oncogene, Src Family Tyrosine Kinase     | LYN      | 2.2 | Ab |   |
| C-X-C Motif Chemokine Ligand 16                    | CXCL16   | 2.2 | Ab |   |
| Ectonucleotide Pyrophosphatase/Phosphodiesterase 2 | ENPP2    | 2.2 | Ab | √ |
| Protein Tyrosine Phosphatase, Receptor Type D      | PTPRD    | 2.2 | Ab |   |
| Neuregulin 1                                       | NRG1     | 2.2 | Ab |   |
| Insulin Like Growth Factor 2 Receptor              | IGF2R    | 2.2 | Ab |   |
| Secreted Phosphoprotein 1                          | SPP1     | 2.1 | Ab |   |
| TIMP Metallopeptidase Inhibitor 3                  | TIMP3    | 2.1 | Ab |   |
| Interleukin 12 Receptor Subunit Beta 2             | IL12RB2  | 2.1 | Ab |   |
| Bruton Tyrosine Kinase                             | BTK      | 2.1 | Ab |   |
| Interleukin 36, Beta                               | IL36B    | 2.1 | Ab |   |
| Troponin I3, Cardiac Type                          | TNNI3    | 2.1 | Ab |   |
| C-X3-C Motif Chemokine Ligand 1                    | CX3CL1   | 2.1 | Ab |   |
| Apolipoprotein A4                                  | APOA4    | 2.1 | Ab |   |
| C-Src Tyrosine Kinase                              | CSK      | 2.1 | Ab |   |
| Muscle Associated Receptor Tyrosine Kinase         | MUSK     | 2.1 | Ab |   |
| Alpha-2-Macroglobulin                              | A2M      | 2.1 | Ab |   |
| Retinol Binding Protein 4                          | RBP4     | 2.1 | Ab |   |
| Insulin Like Growth Factor 1                       | IGF1     | 2.1 | Ab |   |

|                                                        |          |     |    |   |
|--------------------------------------------------------|----------|-----|----|---|
| C-C Motif Chemokine Ligand 21                          | CCL21    | 2.1 | Ab |   |
| Rho Associated Coiled-Coil Containing Protein Kinase 2 | ROCK2    | 2.1 | Ab |   |
| Tumor Necrosis Factor                                  | TNF      | 2.1 | Ab |   |
| Vascular Endothelial Growth Factor A                   | VEGFA    | 2.1 | Ab |   |
| Neuregulin 1                                           | NRG1     | 2.1 | Ab |   |
| Interleukin 6 Receptor                                 | IL6R     | 2.1 | Ab |   |
| Serpin Family E Member 1                               | SERPINE1 | 2.1 | Ab | √ |
| ROS Proto-Oncogene 1, Receptor Tyrosine Kinase         | ROS1     | 2.1 | Ab |   |
| Somatostatin Receptor 5                                | SSTR5    | 2.1 | Ab |   |
| Interleukin 10                                         | IL10     | 2.1 | Ab |   |
| Cystatin A                                             | CSTA     | 2.1 | Ab |   |
| Fibroblast Growth Factor Receptor-Like 1               | FGFRL1   | 2.0 | Ab |   |
| Angiotensin 1                                          | ANGPT1   | 2.0 | Ab |   |
| Fyn Related Src Family Tyrosine Kinase                 | FRK      | 2.0 | Ab |   |
| Somatostatin Receptor 2                                | SSTR2    | 2.0 | Ab |   |
| Angiotensinogen                                        | AGT      | 2.0 | Ab | √ |
| Insulin Like Growth Factor Binding Protein 1           | IGFBP1   | 2.0 | Ab |   |
| TXK Tyrosine Kinase                                    | TXK      | 2.0 | Ab |   |
| Aldolase, Fructose-Bisphosphate C                      | ALDOC    | 2.0 | Ab | √ |
| Activin A Receptor Type 1B                             | ACVR1B   | 2.0 | Ab |   |
| Bone Morphogenetic Protein 3                           | BMP3     | 2.0 | Ab |   |
| Tumor Necrosis Factor Superfamily Member 8             | TNFSF8   | 2.0 | Ab |   |
| Junction Adhesion Molecule Like                        | JAML     | 2.0 | Ab |   |
| Tyrosine Kinase Non Receptor 2                         | TNK2     | 2.0 | Ab |   |
| Fibrinogen Alpha Chain                                 | FGA      | 2.0 | Ab |   |
| Interleukin 1 Receptor Like 2                          | IL1RL2   | 2.0 | Ab |   |
| Troponin C1, Slow Skeletal And Cardiac Type            | TNNC1    | 2.0 | Ab |   |
| Glial Cell Derived Neurotrophic Factor                 | GDNF     | 2.0 | Ab |   |
| Growth Hormone 1                                       | GH1      | 2.0 | Ab |   |
| Neuregulin 1                                           | NRG1     | 2.0 | Ab |   |
| Low Density Lipoprotein Receptor                       | LDLR     | 2.0 | Ab |   |
| Uromodulin                                             | UMOD     | 2.0 | Ab |   |
| C-C Motif Chemokine Ligand 23                          | CCL23    | 2.0 | Ab |   |
| HCK Proto-Oncogene, Src Family Tyrosine Kinase         | HCK      | 2.0 | Ab |   |
| Frizzled Class Receptor 3                              | FZD3     | 2.0 | Ab |   |
| Interleukin 6 Receptor                                 | SGP130   | 2.0 | Ab |   |
| Albumin                                                | ALB      | 0.5 | Ab |   |
| Folate Receptor 1                                      | FOLR1    | 0.5 | Ab |   |
| Haptoglobin                                            | HP       | 0.4 | Ab |   |
| Alpha-2-Glycoprotein 1, Zinc-Binding                   | AZGP1    | 0.2 | Ab |   |
| Tumor Necrosis Factor Superfamily Member 11            | TNFSF11  | 0.2 | Ab |   |
| Ribosomal Protein S18                                  | RPS18    | 4.3 | MS |   |
| Ribosomal Protein L18                                  | RPL18    | 4.1 | MS |   |
| Filamin A                                              | FLNA     | 1.6 | MS | √ |
| T-Complex 1                                            | TCP1     | 1.9 | MS |   |
| Enolase 1                                              | ENO1     | 1.5 | MS | √ |
| Chaperonin Containing TCP1 Subunit 5                   | CCT5     | 2.9 | MS |   |
| Collagen Type V Alpha 1 Chain                          | COL5A1   | 0.6 | MS | √ |
| Aldolase, Fructose-Bisphosphate A                      | ALDOA    | 2.4 | MS | √ |
| Vimentin                                               | VIM      | 2.8 | MS | √ |
| Inter-Alpha-Trypsin Inhibitor Heavy Chain 1            | ITIH1    | 1.9 | MS |   |
| Serglycin                                              | SRGN     | 0.5 | MS | √ |
| Transketolase                                          | TKT      | 2.1 | MS | √ |
| Proteasome Subunit Alpha 8                             | PSMA8    | 1.8 | MS |   |
| Chaperonin Containing TCP1 Subunit 3                   | CCT3     | 2.7 | MS |   |



|                                                      |        |     |    |   |
|------------------------------------------------------|--------|-----|----|---|
| Prosaposin                                           | PSAP   | 0.4 | MS | √ |
| Transgelin 2                                         | TAGLN2 | 1.7 | MS | √ |
| Ribosomal Protein S3                                 | RPS3   | 3.1 | MS | √ |
| Phosphoserine Aminotransferase 1                     | PSAT1  | 2.8 | MS | √ |
| Vinculin                                             | VCL    | 1.8 | MS | √ |
| Heat Shock Protein Family A (Hsp70) Member 8         | HSPA8  | 1.8 | MS | √ |
| Transaldolase 1                                      | TALDO1 | 1.8 | MS | √ |
| Gelsolin                                             | GSN    | 0.4 | MS | √ |
| Lactate Dehydrogenase A                              | LDHA   | 1.9 | MS | √ |
| Fatty Acid Binding Protein 5                         | FABP5  | 2.3 | MS |   |
| Alcohol Dehydrogenase 1B (Class I), Beta Polypeptide | ADH1B  | 2.1 | MS |   |
| Platelet Derived Growth Factor Receptor Beta         | PDGFRB | 0.1 | MS |   |
| Ribosomal Protein L29                                | RPL29  | 3.3 | MS |   |
| Ribosomal Protein S5                                 | RPS5   | 3.0 | MS |   |
| Aspartyl-TRNA Synthetase                             | DARS   | 3.2 | MS |   |

**Supplementary Table S3.** Donor hMSCs cell lines.

| BM-hMSCs (Donor) | Age   | Gender |
|------------------|-------|--------|
| 1                | 39    | Male   |
| 2                | 23    | Male   |
| 3                | 29    | Female |
| 4                | 20    | Male   |
| 5                | 38    | Male   |
| 6                | 18    | Male   |
| 7                | 25-40 | Female |
| 8                | 25-40 | Male   |
